# Supplementary material for: Targeting heterogeneity of adrenocortical carcinoma: Evaluation and extension of preclinical tumor models to improve clinical translation
Source: PubMed Central journal article supplement (PMC5346714; doi:10.18632/oncotarget.12685), 2016-10-15
Supplement: oncotarget-07-79292-s001.pdf [file oncotarget-07-79292-s001.pdf]

## Targeting heterogeneity of adrenocortical carcinoma: Evaluation and extension of preclinical tumor models to improve clinical translation

### SUPPLEMENTARY FIGURE AND TABLE

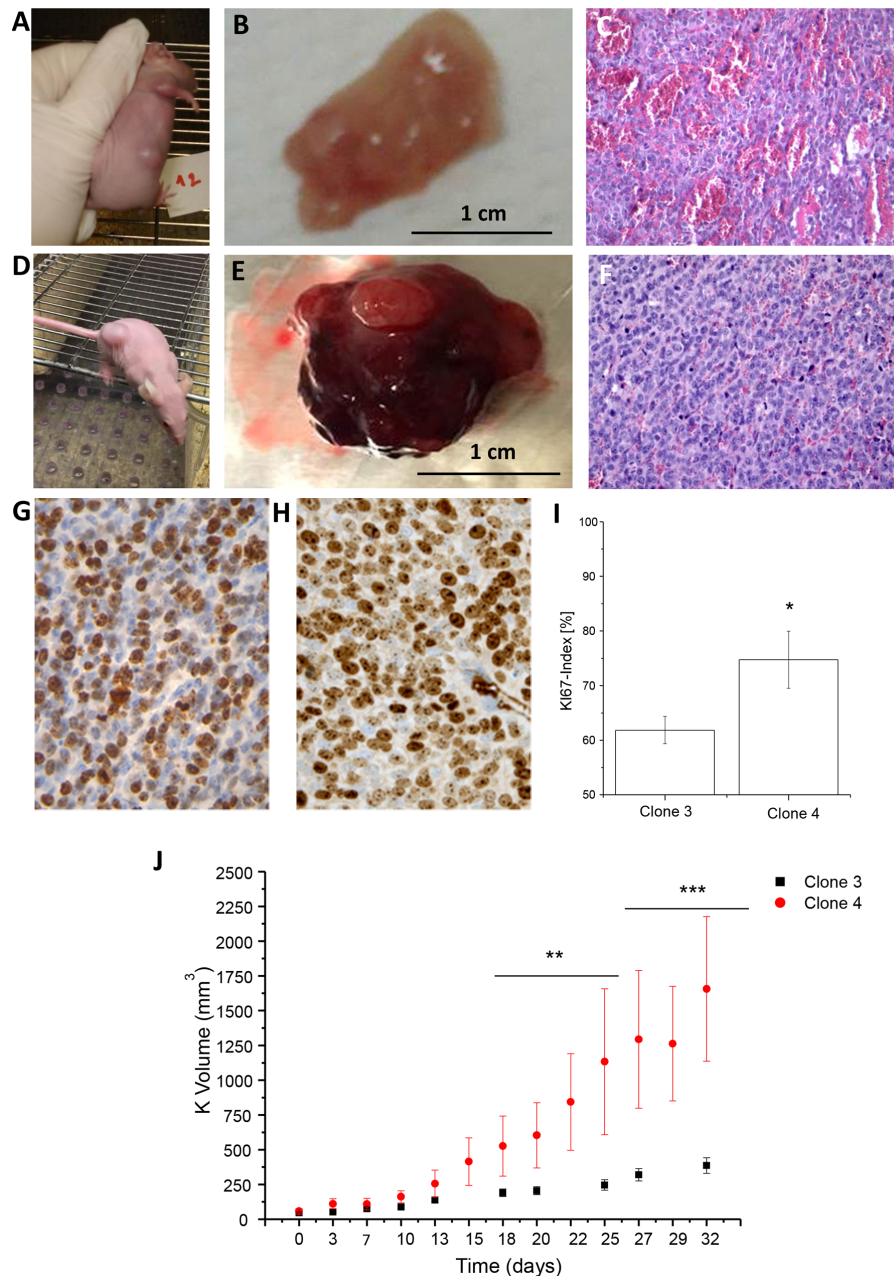

**Supplementary Figure S1: Comparative features of xenografts obtained with different H295R clones.** Pictures of representative athymic nude mice bearing H295R xenografts and H&E sections of clones 3 **A**, **B**, **C**. and 4 **D**, **E**, **F**. Representative Ki67 **G**, **H**. stainings as well as the quantification of proliferation index **I**. of the two tumoral clones. Statistical significance evaluated with Student's t- test:  $p < 0.05$ ,  $n = 10$ ). **J**. Differences in tumor growth rate of the H295R clones used for xenograft experiments. Stars denote significant differences starting from day 18 ( \*\* $p < 0.01$ ; \*\*\* $p < 0.001$ ,  $n = 15$  and  $n = 6$ , clones 3 and 4 respectively). Animal studies were performed in compliance with an institutionally approved protocol (University of Florence) and according to the National Institutes of Health Guide for the Care and Use of Laboratory Animals.

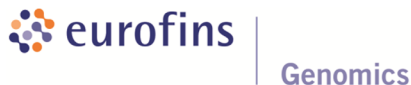

Eurofins Medigenomix GmbH, Anzinger Str. 7 a, D-85560 Ebersberg
Medizinische Klinik und Poliklinik IV
Endokrinologische Forschung
z. Hd. Dr. Constanze Hantel
Ludwig-Maximilians-Universität
Ziemssenstrasse 1
80336 München

Dr. Rainer Schubbert
Head of Operations Applied Genomics
and Head of Operational Excellence
Tel.: +49 8092 8289-277
Fax: +49 8092 8289-201
rainerschubbert@eurofins.com

29 January 2016

Subject: Examination for cross-contamination of murine DNA

Sample Name: CL151006\_001
Sample Description: DNA
Ordered by: Medizinische Klinik und Poliklinik IV / LMU München
Sample Shipped from: Medizinische Klinik und Poliklinik IV / LMU München
Received on: 23.11.2015
Packaging: tube
Start/End of Analysis: 03.02.2015 / 01.12.2015

Sample preparation, Method and References:

2 µL of the customer provided DNA sample were applied to one murine specific Real-Time-PCR assay (18s gene) to detect murine DNA. One positive and negative control were analysed simultaneously.

Test results:

The analyzed sample CL151006\_001 showed no amplification product.

Conclusion:

The analyzed sample CL151006\_001 showed no cross-contamination of murine DNA.

Yours Sincerely
Eurofins Medigenomix GmbH

[Handwritten signature of R. Schubbert]

[Handwritten signature of K. Steinmann]

Dr. Rainer Schubbert
Head of Operations Applied Genomics
and Head of Operational Excellence

Dr. biol. hum. Katharina Steinmann
Project Manager Applied Genomics

Our General Terms and Conditions apply exclusively and may be viewed or downloaded under eurofinsgenomics.com. German law applies exclusively, with the exception of the UN-Convention Contracts for the International Sale of Goods.

Eurofins Medigenomix GmbH
Anzinger Straße 7 a
85560 Ebersberg
Germany

Tel.: +49 8092 8289-200
Fax: +49 8092 8289-201
Email: info-eu@eurofins.com
Web: eurofinsgenomics.com

Managing Directors: Dr. Peter Persigehl,
Bruno Poddevin, Ph.D.
Register Court Munich HRB 207710
VAT ID: DE815473648, Tax No.: 114/116/00167

HypoVereinsbank München
BSB: 700 202 70, Account No.: 273 50 40
IBAN: DE44 7002 0270 0002 7350 40
SWIFT: HYVE DEMMXXX

Supplementary Figure S2: Examination of MUC-1 cells for cross-contamination of murine DNA.

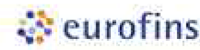

Genomics

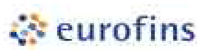

Forensik

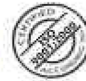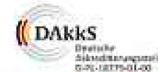

ISO 17025:2005 accredited

Klinikum der Universität München  
 Medizinische Klinik  
 Igor Shapiro  
 Ziemssenstr. 1  
 80336 München  
 Germany

28.10.2015

### Certificate

**Order**

By order of Igor Shapiro (Klinikum der Universität München) we were requested to perform a cell line authentication test. Following samples were examined:

| <u>Our sample number</u> | <u>Client sample name</u> |
|--------------------------|---------------------------|
| CL151006_001             | unknown                   |

**Method:**

DNA was isolated separately from the samples.  
 Genetic characteristics were determined by PCR-single-locus-technology. 21 independent PCR-systems Amelogenin, D3S1358, D1S1656, D6S1043, D13S317, Penta E, D16S539, D18S51, D2S1338, CSF1PO, Penta D, TH01, vWA, D21S11, D7S820, D5S818, TPOX, D8S1179, D12S391, D19S433 and FGA were investigated (Promega, PowerPlex 21 PCR Kit).

With the Argus-X12 PCR Kit nine (13) independent PCR-systems were analysed: Amelogenin, DXS8378, HPRTB, DXS7423, DXS7132, DXS10134, DXS10074, DXS10101, DXS10103, DXS10146, DXS10179, DXS10148 and DXS10135.

In parallel, positive and negative controls were carried out yielding correct results.

Eurofins Medigenomix  
 Forensik GmbH  
 Anzingerstr. 7a  
 D-85560 Ebersberg

Tel. + 49 (0) 8092 8289 260  
 Fax. + 49 (0) 8092 8289 190  
 www.eurofins.de/forensik-de  
[forensik@eurofins.com](mailto:forensik@eurofins.com)

Geschäftsführer  
 Dr. Peter Persigehl  
 Dr. Brigitte Obermaier  
 Dr. Bruno Poddevin

HRB 20 12 60  
 Amtsgericht München

Ust-Id.Nr. DE 285161076  
 Steuernummer 114/116/00159

Supplementary Figure S3: Certificate of authentication of the novel MUC-1 cell line. (Continued)

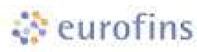

Genomics

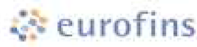

Forensik

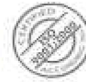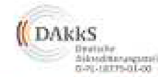

ISO 17025:2005 accredited

**Results:**

| DNA-System | DNA-criteria<br>unknown<br>CL151006_001 |
|------------|-----------------------------------------|
| AM         | X                                       |
| DXS10074   | 8                                       |
| DXS10079   | 20                                      |
| DXS10101   | 30,2                                    |
| DXS10103   | 19                                      |
| DXS10134   | 37                                      |
| DXS10135   | 28                                      |
| DXS10146   | 29                                      |
| DXS10148   | 18                                      |
| DXS7132    | 15                                      |
| DXS7423    | 14                                      |
| DXS8378    | 11                                      |
| HPRTB      | 11                                      |
| D3S1358    | 16, 18                                  |
| D1S1656    | 15, 15                                  |
| D6S1043    | 12, 12                                  |
| D13S317    | 9, 9                                    |
| Penta E    | 7, 13                                   |
| D16S539    | 11, 14                                  |
| D18S51     | 14, 18                                  |
| D2S1338    | 26, 26                                  |
| CSF1PO     | 12, 12                                  |
| Penta D    | 9, 9                                    |
| TH01       | 9,3, 9,3                                |
| vWA        | 16, 17                                  |
| D21S11     | 29, 29                                  |
| D7S820     | 8, 10                                   |
| D5S818     | 11, 11                                  |
| TPOX       | 8, 8                                    |
| D8S1179    | 8, 8                                    |
| D12S391    | 19,3, 22                                |
| D19S433    | 13, 14                                  |
| FGA        | 22, 23,2                                |

Eurofins Medigenomix  
Forensik GmbH  
Anzingerstr. 7a  
D-85560 Ebersberg

Tel. + 49 (0) 8092 8289 260  
Fax. + 49 (0) 8092 8289 190  
www.eurofins.de/forensik-de  
[forensik@eurofins.com](mailto:forensik@eurofins.com)

Geschäftsführer  
Dr. Peter Persigehl  
Dr. Brigitte Obermaier  
Dr. Bruno Poddevin

HRB 20 12 60  
Amtsgericht München

Ust.-Id.Nr. DE 285161076  
Steuernummer 114/116/00169

**Supplementary Figure S3: (Continued) Certificate of authentication of the novel MUC-1 cell line. (Continued)**



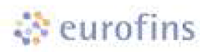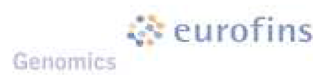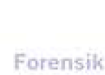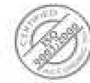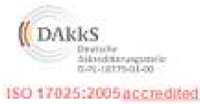**Summary:**

The following cell line was compared to the online database of the DSMZ (<http://www.dsmz.de/de/service/services-human-and-animal-cell-lines/online-str-analysis.html>):

| <u>Our sample number</u> | <u>Client sample name</u> | <u>DSMZ name</u>         |
|--------------------------|---------------------------|--------------------------|
| CL151006_001             | unknown                   | Not detected in the DSMZ |

The sample CL151006\_001 is of human and potentially male origin. The loss of the Y chromosome was proven by X-chromosomal markers showing a hemizygous profile.

Dr. Burkhard Rolf  
Director Forensic Services

Dr. Kerstin Knoop  
Project Manager DNA-Forensics

Eurofins Medigenomix Forensik GmbH carries out all analyses with greatest care and on the basis of state of the art scientific knowledge. All results solely refer to the analysed samples. Our expert's reports must not be duplicated in extracts without consent of Eurofins Medigenomix Forensik GmbH.

Cell\_line-certificate\_eng\_V03\_141211

Vorlage\_Verwandschaftsanalyse\_EUROFINS\_v02\_121127

Eurofins Medigenomix  
Forensik GmbH  
Anzingerstr. 7a  
D-85560 Ebersberg

Tel. + 49 (0) 8092 8289 260  
Fax. + 49 (0) 8092 8289 190  
[www.eurofins.de/forensik-de](http://www.eurofins.de/forensik-de)  
[forensik@eurofins.com](mailto:forensik@eurofins.com)

Geschäftsführer  
Dr. Peter Persigehl  
Dr. Brigitte Obermaier  
Dr. Bruno Poddevin

HRB 20 12 60  
Amtsgericht München

Ust-Id.Nr. DE 285161076  
Steuernummer 114/116/00159

**Supplementary Figure S3: (Continued) Certificate of authentication of the novel MUC-1 cell line.**

Supplementary Table S1: Detailed cell line authentication profile of MUC-1 cells

| DNA-System | DNA-Criteria |
|------------|--------------|
| AM         | X            |
| DXS10074   | 8            |
| DXS10079   | 20           |
| DXS10101   | 30.2         |
| DXS10103   | 19           |
| DXS10134   | 37           |
| DXS10135   | 28           |
| DXS10146   | 29           |
| DXS10148   | 18           |
| DXS7132    | 15           |
| DXS7423    | 14           |
| DXS8378    | 11           |
| HPRTB      | 11           |
| D3S1358    | 16, 18       |
| D1S1656    | 15, 15       |
| D6S1043    | 12, 12       |
| D13S317    | 9, 9         |
| Penta E    | 7, 13        |
| D16S539    | 11, 14       |
| D18S51     | 14, 18       |
| D2S1338    | 26, 26       |
| CSF1PO     | 12, 12       |
| Penta D    | 9, 9         |
| TH01       | 9.3 9.3      |
| vWA        | 16, 17       |
| D21S11     | 29, 29       |
| D7S820     | 8, 10        |
| D5S818     | 11, 11       |
| TPOX       | 8, 8         |
| D8S1179    | 8, 8         |
| D12S391    | 19.3, 22     |
| D19S433    | 13, 14       |
| FGA        | 22, 23.2     |

Genetic characteristics determined by PCR-Single-Locus Technology.
